# Supplementary material for: Multi-Omic analyses characterize the ceramide/sphingomyelin pathway as a therapeutic target in Alzheimer’s disease
Source: PubMed Central journal article supplement (PMC9547905; doi:10.1038/s42003-022-04011-6), 2022-10-08
Supplement: 42003_2022_4011_MOESM1_ESM.pdf [file 42003_2022_4011_MOESM1_ESM.pdf]

## Supplementary Information

### **Multi-Omic Analyses Characterize the Ceramide/Sphingomyelin Pathway as a Therapeutic Target in Alzheimer's Disease**

Priyanka Baloni<sup>1,2\*</sup>, Matthias Arnold<sup>3,4\*</sup>, Luna Buitrago<sup>5\*</sup>, Kwangsik Nho<sup>6\*</sup>, Herman Moreno<sup>5</sup>, Kevin Huynh<sup>7</sup>, Barbara Brauner<sup>3</sup>, Gregory Louie<sup>4</sup>, Alexandra Kueider-Paisley<sup>4</sup>, Karsten Suhre<sup>8</sup>, Andrew J. Saykin<sup>6</sup>, Kim Ekroos<sup>9</sup>, Peter J. Meikle<sup>7</sup>, Leroy Hood<sup>1</sup>, Nathan D. Price<sup>1</sup>, The Alzheimer's Disease Metabolomics Consortium, P. Murali Doraiswamy<sup>4</sup>, Cory C. Funk<sup>1</sup>, A. Iván Hernández<sup>10</sup>, Gabi Kastenmüller<sup>3</sup>, Rebecca Baillie<sup>11</sup>, Xianlin Han<sup>12‡</sup>, and Rima Kaddurah-Daouk<sup>4,13,14</sup>. A full list of The Alzheimer's Disease Metabolomics Consortium members appears at the end of this paper.

\* Equal contribution

#### **Author's affiliations**

- <sup>1</sup> Institute for Systems Biology, Seattle, WA, USA
- <sup>2</sup> School of Health Sciences and Purdue Institute for Integrative Neuroscience, Purdue University, West Lafayette, IN, USA
- <sup>3</sup> Institute of Computational Biology, Helmholtz Zentrum München - German Research Center for Environmental Health, Neuherberg, Germany
- <sup>4</sup> Department of Psychiatry and Behavioral Sciences, Duke University School of Medicine, Durham, Durham, NC, USA.
- <sup>5</sup> Department of Neurology/Pharmacology, SUNY Downstate Medical Center, Brooklyn, NY, USA
- <sup>6</sup> Indiana Alzheimer's Disease Research Center and Department of Radiology and Imaging Sciences, Indiana University School of Medicine, Indianapolis, IN, USA
- <sup>7</sup> Metabolomics Laboratory, Baker Heart and Diabetes Institute, Melbourne, VIC, Australia
- <sup>8</sup> Department of Physiology and Biophysics, Weill Cornell Medicine-Qatar, Education City, PO 24144, Doha, Qatar
- <sup>9</sup> Lipidomics Consulting Ltd., Esbo, Finland
- <sup>10</sup> Department of Pathology, SUNY Downstate Medical Center, Brooklyn, NY, USA
- <sup>11</sup> Rosa & Co LLC, San Carlos, CA, USA
- <sup>12</sup> University of Texas Health Science Center at San Antonio, San Antonio, TX, USA

<sup>13</sup> Department of Medicine, Duke University, Durham, NC, USA

<sup>14</sup> Duke Institute of Brain Sciences, Duke University, Durham, NC, USA

**Corresponding Authors:**

Rima Kaddurah-Daouk, PhD  
Email: [kaddu001@mc.duke.edu](mailto:kaddu001@mc.duke.edu)

Xianlin Han, PhD  
Email: [hanx@uthscsa.edu](mailto:hanx@uthscsa.edu)

**Supplementary Table 1. List of enzymes in the sphingomyelin pathway. The list of enzymes was curated from human genome-scale metabolic reconstruction, Recon 3D.**

| Gene Symbol | Ensembl Gene ID | Gene Name                                                     | Reaction                           | Differential Expression | Trait GWAS | mGWAS |
|-------------|-----------------|---------------------------------------------------------------|------------------------------------|-------------------------|------------|-------|
| SPTLC1      | ENSG00000090054 | serine palmitoyltransferase, long chain base subunit 1        | serine palmitoyltransferase        | x                       |            |       |
| SPTLC2      | ENSG00000100596 | serine palmitoyltransferase, long chain base subunit 2        |                                    |                         |            |       |
| SPTLC3      | ENSG00000172296 | serine palmitoyltransferase, long chain base subunit 3        |                                    | x                       | x          | x     |
| KDSR        | ENSG00000119537 | 3-ketodihydrosphingosine reductase                            | 3-ketodihydrosphingosine reductase | x                       |            |       |
| CERS1       | ENSG00000223802 | ceramide synthase 1                                           | ceramide synthase                  | x                       |            |       |
| CERS2       | ENSG00000143418 | ceramide synthase 2                                           |                                    | x                       | x          | x     |
| CERS3       | ENSG00000154227 | ceramide synthase 3                                           |                                    |                         | x          |       |
| CERS4       | ENSG00000090661 | ceramide synthase 4                                           |                                    | x                       |            | x     |
| CERS5       | ENSG00000139624 | ceramide synthase 5                                           |                                    | x                       |            |       |
| CERS6       | ENSG00000172292 | ceramide synthase 6                                           |                                    | x                       | x          |       |
| DEGS1       | ENSG00000143753 | delta(4)-desaturase, sphingolipid 1                           | dihydroceramide desaturase         | x                       | x          |       |
| DEGS2       | ENSG00000168350 | delta(4)-desaturase, sphingolipid 2                           |                                    |                         |            |       |
| ACER1       | ENSG00000167769 | alkaline ceramidase 1                                         | ceramidase                         |                         |            |       |
| ACER2       | ENSG00000177076 | alkaline ceramidase 2                                         |                                    | x                       | x          |       |
| ACER3       | ENSG00000078124 | alkaline ceramidase 3                                         |                                    | x                       |            |       |
| ASAH1       | ENSG00000104763 | N-acylsphingosine amidohydrolase (acid ceramidase) 1          |                                    |                         |            |       |
| ASAH2       | ENSG00000188611 | N-acylsphingosine amidohydrolase (non-lysosomal ceramidase) 2 |                                    |                         |            |       |
| SGMS1       | ENSG00000198964 | sphingomyelin synthase 1                                      | sphingomyelin synthase             | x                       | x          |       |
| SGMS2       | ENSG00000164023 | sphingomyelin synthase 2                                      |                                    |                         |            |       |
| SMPD1       | ENSG00000166311 | sphingomyelin phosphodiesterase 1, acid lysosomal             | sphingomyelin phosphodiesterase    |                         |            |       |

|       |                 |                                                     |                                 |   |   |   |
|-------|-----------------|-----------------------------------------------------|---------------------------------|---|---|---|
| SMPD2 | ENSG00000135587 | sphingomyelin phosphodiesterase 2, neutral membrane |                                 |   | x |   |
| SMPD3 | ENSG00000103056 | sphingomyelin phosphodiesterase 3, neutral membrane |                                 | x |   |   |
| SMPD4 | ENSG00000136699 | sphingomyelin phosphodiesterase 4, neutral membrane |                                 | x |   |   |
| ENPP7 | ENSG00000182156 | ectonucleotide pyrophosphatase/phosphodiesterase 7  |                                 |   |   |   |
| CERK  | ENSG00000100422 | ceramide kinase                                     | ceramide kinase                 | x |   |   |
| UGCG  | ENSG00000148154 | UDP-glucose ceramide glucosyltransferase            | ceramide glucosyltransferase    |   |   |   |
| GBA   | ENSG00000177628 | glucosidase, beta, acid                             | glucosylceramidase              |   |   |   |
| SPHK1 | ENSG00000176170 | sphingosine kinase 1                                | sphingosine kinase              | x |   |   |
| SPHK2 | ENSG00000063176 | sphingosine kinase 2                                |                                 |   | x | x |
| PLPP1 | ENSG00000067113 | phospholipid phosphatase 1                          | phospholipid phosphatase        | x |   |   |
| PLPP2 | ENSG00000141934 | phospholipid phosphatase 2                          |                                 |   | x |   |
| PLPP3 | ENSG00000162407 | phospholipid phosphatase 3                          |                                 | x |   |   |
| SGPP1 | ENSG00000126821 | sphingosine-1-phosphate phosphatase 1               |                                 |   |   | x |
| SGPP2 | ENSG00000163082 | sphingosine-1-phosphate phosphatase 2               |                                 | x |   |   |
| SGPL1 | ENSG00000166224 | sphingosine-1-phosphate lyase 1                     | sphingosine-1-phosphate lyase 1 | x |   | x |

**Supplementary Table 2. Differential expression for genes in the SM pathway. The expression changes were analyzed from post-mortem brain samples and compared in AD vs controls. Statistical analysis of SMS, SPT, and CERK reactions.**

| Gene Symbol | Ensembl Gene Id | Brain Region- & Study-Specific Analysis |                 |              |            | Fixed-Effects Meta-Analysis |            |                 | Random-Effects Meta-Analysis |            |                 | Heterogeneity Statistics |       |       |       |
|-------------|-----------------|-----------------------------------------|-----------------|--------------|------------|-----------------------------|------------|-----------------|------------------------------|------------|-----------------|--------------------------|-------|-------|-------|
|             |                 | Log (FC)                                | q-value         | Brain Region | Study      | Estimate                    | Std. Error | q-value         | Estimate                     | Std. Error | q-value         | Q                        | Tau   | H     | I2    |
| CERS6       | ENSG00000172292 | 0.894                                   | <b>1.65E-08</b> | CBE          | MayoRNAseq | 0.031                       | 0.066      | 7.25E-01        | 0.024                        | 0.189      | 9.43E-01        | 47.064                   | 0.466 | 2.801 | 0.873 |
|             |                 | -0.17                                   | <b>1.96E-02</b> | PHG          | MSBB       |                             |            |                 |                              |            |                 |                          |       |       |       |
| ACER2       | ENSG00000177076 | 0.498                                   | <b>4.00E-04</b> | CBE          | MayoRNAseq | 0.101                       | 0.066      | 2.00E-01        | 0.077                        | 0.125      | 6.97E-01        | 20.735                   | 0.280 | 1.859 | 0.711 |
|             |                 | 0.288                                   | <b>4.32E-02</b> | TCX          | MayoRNAseq |                             |            |                 |                              |            |                 |                          |       |       |       |
| SPTLC1      | ENSG00000090054 | 0.227                                   | <b>7.00E-04</b> | CBE          | MayoRNAseq | 0.256                       | 0.066      | <b>5.06E-04</b> | 0.261                        | 0.073      | <b>3.13E-03</b> | 6.452                    | 0.084 | 1.037 | 0.070 |
|             |                 | 0.069                                   | 6.79E-02        | PHG          | MSBB       |                             |            |                 |                              |            |                 |                          |       |       |       |
|             |                 | 0.054                                   | 3.42E-01        | IFG          | MSBB       |                             |            |                 |                              |            |                 |                          |       |       |       |
|             |                 | 0.203                                   | <b>2.50E-03</b> | TCX          | MayoRNAseq |                             |            |                 |                              |            |                 |                          |       |       |       |
|             |                 | 0.021                                   | 7.57E-01        | FP           | MSBB       |                             |            |                 |                              |            |                 |                          |       |       |       |
|             |                 | 0.059                                   | 2.32E-01        | STG          | MSBB       |                             |            |                 |                              |            |                 |                          |       |       |       |
| SGPP2       | ENSG00000163082 | 0.369                                   | <b>8.00E-04</b> | CBE          | MayoRNAseq | 0.102                       | 0.065      | 1.94E-01        | 0.098                        | 0.105      | 5.29E-01        | 14.998                   | 0.214 | 1.581 | 0.600 |
|             |                 | 0.086                                   | 1.82E-01        | STG          | MSBB       |                             |            |                 |                              |            |                 |                          |       |       |       |
| CERS4       | ENSG00000090661 | 0.062                                   | 4.12E-01        | IFG          | MSBB       | 0.393                       | 0.066      | <b>8.93E-08</b> | 0.393                        | 0.066      | <b>2.30E-07</b> | 1.532                    | 0     | 1     | 0     |
|             |                 | 0.181                                   | <b>6.00E-04</b> | TCX          | MayoRNAseq |                             |            |                 |                              |            |                 |                          |       |       |       |
|             |                 | 0.098                                   | <b>4.68E-02</b> | PHG          | MSBB       |                             |            |                 |                              |            |                 |                          |       |       |       |
|             |                 | 0.122                                   | <b>3.27E-02</b> | FP           | MSBB       |                             |            |                 |                              |            |                 |                          |       |       |       |
|             |                 | 0.155                                   | <b>4.00E-03</b> | CBE          | MayoRNAseq |                             |            |                 |                              |            |                 |                          |       |       |       |
|             |                 | 0.092                                   | <b>2.87E-02</b> | DLPFC        | ROSMAP     |                             |            |                 |                              |            |                 |                          |       |       |       |
| SMPD4       | ENSG00000136699 | 0.038                                   | 4.76E-01        | FP           | MSBB       | 0.224                       | 0.066      | <b>2.46E-03</b> | 0.205                        | 0.095      | 9.42E-02        | 12.279                   | 0.178 | 1.431 | 0.511 |
|             |                 | -0.012                                  | 8.52E-01        | TCX          | MayoRNAseq |                             |            |                 |                              |            |                 |                          |       |       |       |
|             |                 | 0.014                                   | 8.41E-01        | IFG          | MSBB       |                             |            |                 |                              |            |                 |                          |       |       |       |
|             |                 | 0.074                                   | <b>5.40E-03</b> | DLPFC        | ROSMAP     |                             |            |                 |                              |            |                 |                          |       |       |       |
|             |                 | 0.15                                    | <b>5.10E-03</b> | CBE          | MayoRNAseq |                             |            |                 |                              |            |                 |                          |       |       |       |

|       |                 |        |                 |       |            |        |       |                 |        |       |                 |        |       |       |       |
|-------|-----------------|--------|-----------------|-------|------------|--------|-------|-----------------|--------|-------|-----------------|--------|-------|-------|-------|
|       |                 | 0.034  | 4.97E-01        | STG   | MSBB       |        |       |                 |        |       |                 |        |       |       |       |
|       |                 | 0.004  | 9.26E-01        | PHG   | MSBB       |        |       |                 |        |       |                 |        |       |       |       |
| PLPP1 | ENSG00000067113 | 0.177  | <b>7.20E-03</b> | DLPFC | ROSMAP     | 0.463  | 0.066 | <b>3.51E-10</b> | 0.463  | 0.087 | <b>4.20E-06</b> | 10.079 | 0.145 | 1.296 | 0.405 |
|       |                 | 0.182  | 6.90E-02        | IFG   | MSBB       |        |       |                 |        |       |                 |        |       |       |       |
|       |                 | 0.157  | 8.39E-02        | STG   | MSBB       |        |       |                 |        |       |                 |        |       |       |       |
|       |                 | 0.247  | <b>4.00E-04</b> | PHG   | MSBB       |        |       |                 |        |       |                 |        |       |       |       |
|       |                 | 0.19   | <b>6.40E-03</b> | CBE   | MayoRNAseq |        |       |                 |        |       |                 |        |       |       |       |
|       |                 | 0.061  | 5.90E-01        | FP    | MSBB       |        |       |                 |        |       |                 |        |       |       |       |
|       |                 | 0.35   | <b>3.10E-07</b> | TCX   | MayoRNAseq |        |       |                 |        |       |                 |        |       |       |       |
| CERS5 | ENSG00000139624 | -0.188 | <b>1.01E-02</b> | CBE   | MayoRNAseq | -0.107 | 0.065 | 1.71E-01        | -0.106 | 0.066 | 2.31E-01        | 6.071  | 0.018 | 1.006 | 0.012 |
| SGPL1 | ENSG00000166224 | 0.089  | 1.87E-01        | IFG   | MSBB       | 0.236  | 0.066 | <b>1.50E-03</b> | 0.257  | 0.165 | 2.50E-01        | 37.353 | 0.397 | 2.495 | 0.839 |
|       |                 | 0.189  | <b>6.00E-04</b> | TCX   | MayoRNAseq |        |       |                 |        |       |                 |        |       |       |       |
|       |                 | 0.028  | 7.41E-01        | FP    | MSBB       |        |       |                 |        |       |                 |        |       |       |       |
|       |                 | 0.117  | <b>4.91E-02</b> | STG   | MSBB       |        |       |                 |        |       |                 |        |       |       |       |
|       |                 | 0.074  | 6.52E-02        | DLPFC | ROSMAP     |        |       |                 |        |       |                 |        |       |       |       |
|       |                 | 0.122  | <b>7.50E-03</b> | PHG   | MSBB       |        |       |                 |        |       |                 |        |       |       |       |
|       |                 | -0.135 | <b>1.67E-02</b> | CBE   | MayoRNAseq |        |       |                 |        |       |                 |        |       |       |       |
| CERK  | ENSG00000100422 | 0.058  | 1.84E-01        | DLPFC | ROSMAP     | 0.160  | 0.065 | <b>3.33E-02</b> | 0.160  | 0.065 | 5.31E-02        | 5.580  | 0     | 1     | 0     |
|       |                 | 0.186  | <b>2.15E-02</b> | CBE   | MayoRNAseq |        |       |                 |        |       |                 |        |       |       |       |
|       |                 | 0.048  | 5.35E-01        | IFG   | MSBB       |        |       |                 |        |       |                 |        |       |       |       |
|       |                 | -0.044 | 5.20E-01        | STG   | MSBB       |        |       |                 |        |       |                 |        |       |       |       |
|       |                 | 0.036  | 4.89E-01        | PHG   | MSBB       |        |       |                 |        |       |                 |        |       |       |       |
|       |                 | 0.111  | 1.81E-01        | TCX   | MayoRNAseq |        |       |                 |        |       |                 |        |       |       |       |
|       |                 | 0.023  | 8.00E-01        | FP    | MSBB       |        |       |                 |        |       |                 |        |       |       |       |
| SPHK1 | ENSG00000176170 | 0.08   | 7.58E-01        | FP    | MSBB       | 0.289  | 0.066 | <b>8.59E-05</b> | 0.295  | 0.089 | <b>6.39E-03</b> | 10.886 | 0.155 | 1.347 | 0.449 |
|       |                 | 0.208  | 3.27E-01        | IFG   | MSBB       |        |       |                 |        |       |                 |        |       |       |       |
|       |                 | 0.689  | <b>1.00E-04</b> | TCX   | MayoRNAseq |        |       |                 |        |       |                 |        |       |       |       |
|       |                 | 0.113  | 3.39E-01        | DLPFC | ROSMAP     |        |       |                 |        |       |                 |        |       |       |       |
|       |                 | 0.379  | <b>3.39E-02</b> | CBE   | MayoRNAseq |        |       |                 |        |       |                 |        |       |       |       |
|       |                 | 0.49   | <b>5.00E-04</b> | PHG   | MSBB       |        |       |                 |        |       |                 |        |       |       |       |

|        |                 |        |                 |       |            |       |       |                 |       |       |                 |        |       |       |       |
|--------|-----------------|--------|-----------------|-------|------------|-------|-------|-----------------|-------|-------|-----------------|--------|-------|-------|-------|
|        |                 | 0.004  | 9.87E-01        | STG   | MSBB       |       |       |                 |       |       |                 |        |       |       |       |
| CERS2  | ENSG00000143418 | 0.043  | 8.29E-01        | FP    | MSBB       | 0.293 | 0.066 | <b>6.75E-05</b> | 0.293 | 0.066 | <b>1.75E-04</b> | 7.847  | 0.026 | 1.144 | 0.235 |
|        |                 | 0.131  | 1.59E-01        | DLPFC | ROSMAP     |       |       |                 |       |       |                 |        |       |       |       |
|        |                 | 0.241  | <b>3.82E-02</b> | CBE   | MayoRNAseq |       |       |                 |       |       |                 |        |       |       |       |
|        |                 | 0.107  | 4.45E-01        | STG   | MSBB       |       |       |                 |       |       |                 |        |       |       |       |
|        |                 | 0.287  | <b>1.12E-02</b> | TCX   | MayoRNAseq |       |       |                 |       |       |                 |        |       |       |       |
|        |                 | 0.345  | <b>5.00E-04</b> | PHG   | MSBB       |       |       |                 |       |       |                 |        |       |       |       |
|        |                 | 0.165  | 2.69E-01        | IFG   | MSBB       |       |       |                 |       |       |                 |        |       |       |       |
| KDSR   | ENSG00000119537 | 0.058  | 4.70E-01        | FP    | MSBB       | 0.171 | 0.066 | <b>2.33E-02</b> | 0.193 | 0.141 | 3.20E-01        | 26.902 | 0.326 | 2.117 | 0.777 |
|        |                 | 0.167  | <b>3.50E-03</b> | TCX   | MayoRNAseq |       |       |                 |       |       |                 |        |       |       |       |
|        |                 | -0.104 | 8.00E-02        | CBE   | MayoRNAseq |       |       |                 |       |       |                 |        |       |       |       |
|        |                 | 0.108  | 1.68E-01        | IFG   | MSBB       |       |       |                 |       |       |                 |        |       |       |       |
|        |                 | 0.042  | 5.85E-01        | STG   | MSBB       |       |       |                 |       |       |                 |        |       |       |       |
|        |                 | 0.039  | 3.50E-01        | DLPFC | ROSMAP     |       |       |                 |       |       |                 |        |       |       |       |
|        |                 | 0.15   | <b>4.50E-03</b> | PHG   | MSBB       |       |       |                 |       |       |                 |        |       |       |       |
| SPTLC3 | ENSG00000172296 | 0.571  | <b>4.60E-03</b> | TCX   | MayoRNAseq | NA    | NA    | NA              | NA    | NA    | NA              | NA     | NA    | NA    | NA    |
|        |                 | 0.443  | <b>1.96E-02</b> | PHG   | MSBB       |       |       |                 |       |       |                 |        |       |       |       |
| CERS1  | ENSG00000223802 | -0.091 | 3.27E-01        | CBE   | MayoRNAseq | 0.327 | 0.066 | <b>8.89E-06</b> | 0.346 | 0.134 | <b>3.98E-02</b> | 23.858 | 0.305 | 1.994 | 0.749 |
|        |                 | 0.183  | 1.50E-01        | STG   | MSBB       |       |       |                 |       |       |                 |        |       |       |       |
|        |                 | 0.062  | 7.26E-01        | FP    | MSBB       |       |       |                 |       |       |                 |        |       |       |       |
|        |                 | 0.351  | <b>4.00E-04</b> | PHG   | MSBB       |       |       |                 |       |       |                 |        |       |       |       |
|        |                 | 0.151  | <b>1.74E-02</b> | DLPFC | ROSMAP     |       |       |                 |       |       |                 |        |       |       |       |
|        |                 | 0.164  | 2.62E-01        | IFG   | MSBB       |       |       |                 |       |       |                 |        |       |       |       |
|        |                 | 0.289  | <b>5.00E-04</b> | TCX   | MayoRNAseq |       |       |                 |       |       |                 |        |       |       |       |
| SGMS1  | ENSG00000198964 | 0.214  | <b>1.20E-03</b> | TCX   | MayoRNAseq | 0.093 | 0.065 | 2.37E-01        | 0.082 | 0.112 | 6.36E-01        | 16.514 | 0.236 | 1.659 | 0.637 |
| ACER3  | ENSG00000078124 | 0.041  | 6.86E-01        | IFG   | MSBB       | 0.180 | 0.066 | <b>1.61E-02</b> | 0.167 | 0.101 | 2.20E-01        | 14.130 | 0.199 | 1.535 | 0.575 |
|        |                 | 0.088  | 1.47E-01        | PHG   | MSBB       |       |       |                 |       |       |                 |        |       |       |       |
|        |                 | 0.029  | 8.00E-01        | FP    | MSBB       |       |       |                 |       |       |                 |        |       |       |       |
|        |                 | 0.014  | 8.92E-01        | STG   | MSBB       |       |       |                 |       |       |                 |        |       |       |       |
|        |                 | -0.052 | 5.50E-01        | CBE   | MayoRNAseq |       |       |                 |       |       |                 |        |       |       |       |

|              |                 |        |                 |       |            |        |       |                 |        |       |                 |        |       |       |       |
|--------------|-----------------|--------|-----------------|-------|------------|--------|-------|-----------------|--------|-------|-----------------|--------|-------|-------|-------|
|              |                 | 0.186  | <b>1.41E-02</b> | TCX   | MayoRNAseq |        |       |                 |        |       |                 |        |       |       |       |
|              |                 | 0.1    | <b>2.62E-02</b> | DLPFC | ROSMAP     |        |       |                 |        |       |                 |        |       |       |       |
| <i>DEGS1</i> | ENSG00000143753 | 0.009  | 8.72E-01        | CBE   | MayoRNAseq | 0.197  | 0.065 | <b>8.25E-03</b> | 0.197  | 0.065 | <b>1.49E-02</b> | 5.876  | 0.006 | 1     | 0     |
|              |                 | 0.059  | 6.73E-02        | DLPFC | ROSMAP     |        |       |                 |        |       |                 |        |       |       |       |
|              |                 | 0.071  | 8.52E-02        | PHG   | MSBB       |        |       |                 |        |       |                 |        |       |       |       |
|              |                 | 0.022  | 7.60E-01        | IFG   | MSBB       |        |       |                 |        |       |                 |        |       |       |       |
|              |                 | 0.053  | 2.79E-01        | TCX   | MayoRNAseq |        |       |                 |        |       |                 |        |       |       |       |
|              |                 | 0.045  | 4.58E-01        | FP    | MSBB       |        |       |                 |        |       |                 |        |       |       |       |
|              |                 | 0.023  | 7.12E-01        | STG   | MSBB       |        |       |                 |        |       |                 |        |       |       |       |
| <i>PLPP3</i> | ENSG00000162407 | 0.174  | 2.51E-01        | STG   | MSBB       | 0.197  | 0.066 | <b>8.38E-03</b> | 0.218  | 0.118 | 1.63E-01        | 18.585 | 0.255 | 1.760 | 0.677 |
|              |                 | -0.043 | 8.56E-01        | FP    | MSBB       |        |       |                 |        |       |                 |        |       |       |       |
|              |                 | -0.014 | 9.40E-01        | CBE   | MayoRNAseq |        |       |                 |        |       |                 |        |       |       |       |
|              |                 | 0.087  | 5.73E-01        | DLPFC | ROSMAP     |        |       |                 |        |       |                 |        |       |       |       |
|              |                 | 0.465  | <b>1.00E-03</b> | TCX   | MayoRNAseq |        |       |                 |        |       |                 |        |       |       |       |
|              |                 | 0.272  | <b>1.75E-02</b> | PHG   | MSBB       |        |       |                 |        |       |                 |        |       |       |       |
|              |                 | 0.174  | 3.11E-01        | IFG   | MSBB       |        |       |                 |        |       |                 |        |       |       |       |
| <i>SMPD3</i> | ENSG00000103056 | -0.233 | <b>1.80E-03</b> | TCX   | MayoRNAseq | -0.248 | 0.066 | <b>7.73E-04</b> | -0.272 | 0.107 | <b>4.30E-02</b> | 15.279 | 0.219 | 1.596 | 0.607 |
|              |                 | -0.115 | 7.79E-02        | PHG   | MSBB       |        |       |                 |        |       |                 |        |       |       |       |
|              |                 | -0.102 | 2.36E-01        | FP    | MSBB       |        |       |                 |        |       |                 |        |       |       |       |
|              |                 | -0.081 | 3.59E-01        | STG   | MSBB       |        |       |                 |        |       |                 |        |       |       |       |
|              |                 | -0.038 | 5.46E-01        | DLPFC | ROSMAP     |        |       |                 |        |       |                 |        |       |       |       |
|              |                 | -0.175 | 5.74E-02        | IFG   | MSBB       |        |       |                 |        |       |                 |        |       |       |       |
|              |                 | 0.026  | 7.79E-01        | CBE   | MayoRNAseq |        |       |                 |        |       |                 |        |       |       |       |

| Pathway Enrichment Analysis                                                                                                                        |         |                                |         |            |                  |            |                |      |  |
|----------------------------------------------------------------------------------------------------------------------------------------------------|---------|--------------------------------|---------|------------|------------------|------------|----------------|------|--|
| Total N = number of FDR-significant pathways for respective brain regions. EnrichR package v3.0 and KEGG database was used for enrichment analysis |         |                                |         |            |                  |            |                |      |  |
| Tissue                                                                                                                                             | Total N | Term                           | Overlap | P-value    | Adjusted P-value | Odds Ratio | Combined Score | Rank |  |
| STG                                                                                                                                                | 49      | Sphingolipid signaling pathway | 12/119  | 0.00230194 | 0.028224279      | 2.80241891 | 17.0219055     | 19   |  |



|       |    |                                |        |            |             |            |            |    |
|-------|----|--------------------------------|--------|------------|-------------|------------|------------|----|
| TCX   | 71 | Sphingolipid signaling pathway | 57/119 | 0.00262653 | 0.019617711 | 1.70675056 | 10.1416678 | 42 |
| PHG   | 75 | Sphingolipid signaling pathway | 47/119 | 0.0024407  | 0.015839638 | 1.74919798 | 10.5222494 | 49 |
| CBE   | 0  |                                |        |            |             |            |            |    |
| FP    | 0  |                                |        |            |             |            |            |    |
| IFG   | 0  |                                |        |            |             |            |            |    |
| DLPFC | 0  |                                |        |            |             |            |            |    |

| <b>DEG ranking list</b>                                                                                                                                                                         |            |            |           |            |            |            |              |
|-------------------------------------------------------------------------------------------------------------------------------------------------------------------------------------------------|------------|------------|-----------|------------|------------|------------|--------------|
| Rank of each gene based on significance of differential expression in AD vs controls. Only FDR-significant genes were included in this analysis, and the total number is shown in the last row. |            |            |           |            |            |            |              |
| <b>Gene ID</b>                                                                                                                                                                                  | <b>CBE</b> | <b>TCX</b> | <b>FP</b> | <b>STG</b> | <b>PHG</b> | <b>IFG</b> | <b>DLPFC</b> |
| ENSG00000090054                                                                                                                                                                                 | 1854       | 3409       |           |            |            |            |              |
| ENSG00000100596                                                                                                                                                                                 |            |            |           |            |            |            |              |
| ENSG00000172296                                                                                                                                                                                 |            | 3996       |           |            | 3980       |            |              |
| ENSG00000119537                                                                                                                                                                                 |            | 3736       |           |            | 2394       |            |              |
| ENSG00000223802                                                                                                                                                                                 |            | 2429       |           |            | 796        |            | 974          |
| ENSG00000143418                                                                                                                                                                                 | 5619       | 4934       |           |            | 993        |            |              |
| ENSG00000154227                                                                                                                                                                                 |            |            |           |            |            |            |              |
| ENSG00000090661                                                                                                                                                                                 | 3051       | 2540       | 243       |            | 5313       |            | 1321         |
| ENSG00000139624                                                                                                                                                                                 | 3907       |            |           |            |            |            |              |
| ENSG00000172292                                                                                                                                                                                 | 351        |            |           |            | 3981       |            |              |
| ENSG00000143753                                                                                                                                                                                 |            |            |           |            |            |            |              |
| ENSG00000168350                                                                                                                                                                                 |            |            |           |            |            |            |              |
| ENSG00000167769                                                                                                                                                                                 |            |            |           |            |            |            |              |
| ENSG00000177076                                                                                                                                                                                 | 1609       | 6792       |           |            |            |            |              |
| ENSG00000078124                                                                                                                                                                                 |            | 5200       |           |            |            |            | 1233         |
| ENSG00000104763                                                                                                                                                                                 |            |            |           |            |            |            |              |
| ENSG00000188611                                                                                                                                                                                 |            |            |           |            |            |            |              |
| ENSG00000198964                                                                                                                                                                                 |            | 2937       |           |            |            |            |              |

|                           |      |      |     |     |      |     |      |
|---------------------------|------|------|-----|-----|------|-----|------|
| ENSG00000164023           |      |      |     |     |      |     |      |
| ENSG00000166311           |      |      |     |     |      |     |      |
| ENSG00000135587           |      |      |     |     |      |     |      |
| ENSG00000103056           |      | 3206 |     |     |      |     |      |
| ENSG00000136699           | 3259 |      |     |     |      |     | 462  |
| ENSG00000182156           |      |      |     |     |      |     |      |
| ENSG00000100422           | 4807 |      |     |     |      |     |      |
| ENSG00000067113           | 3454 | 866  |     |     | 878  |     | 572  |
| ENSG00000162407           |      | 2769 |     |     | 3807 |     |      |
| ENSG00000141934           |      |      |     |     |      |     |      |
| ENSG00000148154           |      |      |     |     |      |     |      |
| ENSG00000177628           |      |      |     |     |      |     |      |
| ENSG00000176170           | 5421 | 1426 |     |     | 991  |     |      |
| ENSG00000063176           |      |      |     |     |      |     |      |
| ENSG00000126821           |      |      |     |     |      |     |      |
| ENSG00000163082           | 1933 |      |     |     |      |     |      |
| ENSG00000166224           | 4536 | 2501 |     | 730 | 2882 |     |      |
| Total N significant genes | 6059 | 7017 | 364 | 779 | 5450 | 169 | 1860 |

*Abbreviations:* DLPFC: Dorsolateral Prefrontal Cortex; CBE: Cerebellum; DEG: Differentially expressed genes; FDR: False discovery rate; FP: Frontal pole; IFG: Interior Frontal Gyrus; MayoRNAseq: Mayo clinic RNA-seq study; MSBB: Mount Sinai Brain Bank; PHG: Parahippocampal Gyrus; ROSMAP: Religious Orders Study/Memory and Aging Project; SM: Sphingomyelin; STG: Superior Temporal Gyrus; TCX: Temporal Cortex.

**Supplementary Table 3. Genetic variants in the coding regions of genes in SM pathway associated with AD and A-T-N-C measures. Gene-based association analysis of ADNI individuals were used for identifying the genetic variants.**

| Gene Symbol  | Phenotype                           | Lead SNP   | Position (Grch37)  | Effect Allele | Effect Direction | p-value (Not Adjusted for APOE E4) | p-value (Adjusted for APOE E4) | p-value Threshold | Link to Gene            | Eqtl Direction | Eqtl Source |
|--------------|-------------------------------------|------------|--------------------|---------------|------------------|------------------------------------|--------------------------------|-------------------|-------------------------|----------------|-------------|
| <i>ACER2</i> | CSF p-tau/A $\beta$ <sub>1-42</sub> | rs10118158 | chr9: 19,411,179   | T             | +                | 0.0006625                          | 1.10E-05                       | 2.82E-05          | location (intron)       |                |             |
|              | CSF t-tau/A $\beta$ <sub>1-42</sub> | rs10118158 | chr9: 19,411,179   | T             | +                | 0.0006048                          | 9.29E-06                       | 2.82E-05          | location (intron)       |                |             |
| <i>CERS2</i> | CSF-Abeta                           | rs79427717 | chr1: 150,203,716  | A             | -                | 4.80E-05                           | 8.20E-05                       | 0.0001073         | eQTL                    | -              | GTEEx v8    |
| <i>CERS3</i> | FDG-PET (ROI-based)                 | rs1847325  | chr15: 101,067,542 | C             | +                | 8.78E-06                           | 1.49E-05                       | 9.85E-06          | eQTL; location (intron) | -              | GTEEx v8    |
|              | No AD vs. AD                        | rs8035180  | chr15: 100,995,603 | C             | +                | 7.18E-06                           | -                              | 9.85E-06          | eQTL; location (intron) | +              | GTEEx v8    |
| <i>CERS6</i> | ADAS-Cog13                          | rs829963   | chr2: 169,601,513  | G             | -                | 6.40E-09                           | 1.35E-07                       | 5.43E-06          | eQTL; location (intron) | +              | GTEEx v8    |
|              | ADNI-Executive-Function             | rs829963   | chr2: 169,601,513  | G             | +                | 8.69E-07                           | 9.89E-06                       | 5.43E-06          | eQTL; location (intron) | +              | GTEEx v8    |
|              | ADNI-Memory Score                   | rs829963   | chr2: 169,601,513  | G             | +                | 2.74E-08                           | 6.25E-07                       | 5.43E-06          | eQTL; location (intron) | +              | GTEEx v8    |
|              | RAVLT total score                   | rs829963   | chr2: 169,601,513  | G             | +                | 3.32E-06                           | 2.81E-05                       | 5.43E-06          | eQTL; location (intron) | +              | GTEEx v8    |
|              | CN vs. AD                           | rs829963   | chr2: 169,601,513  | G             | -                | 5.26E-07                           | -                              | 5.43E-06          | eQTL; location (intron) | +              | GTEEx v8    |

|               |                                     |             |                   |   |   |          |          |          |                         |   |          |
|---------------|-------------------------------------|-------------|-------------------|---|---|----------|----------|----------|-------------------------|---|----------|
|               | No AD vs. AD                        | rs145495456 | chr2: 169,602,046 | C | - | 2.24E-08 | -        | 5.43E-06 | location (intron)       |   |          |
| <i>DEGS1</i>  | ADAS-Cog13                          | rs12737029  | chr1: 224,316,205 | C | - | 3.66E-05 | 5.03E-05 | 5.39E-05 | eQTL                    | - | GTEEx v8 |
|               | CN vs. AD                           | rs12737029  | chr1: 224,316,205 | C | - | 5.44E-07 | -        | 5.39E-05 | eQTL                    | - | GTEEx v8 |
|               | No AD vs. AD                        | rs12737029  | chr1: 224,316,205 | C | - | 1.93E-05 | -        | 5.39E-05 | eQTL                    | - | GTEEx v8 |
| <i>PLPP2</i>  | CSF p-tau/A $\beta$ <sub>1-42</sub> | rs12982096  | chr19: 288,738    | T | - | 6.84E-06 | 0.006781 | 6.11E-05 | eQTL; location (intron) | + | GTEEx v8 |
|               | CSF t-tau/A $\beta$ <sub>1-42</sub> | rs12982096  | chr19: 288,738    | T | - | 8.15E-06 | 0.007858 | 6.11E-05 | eQTL; location (intron) | + | GTEEx v8 |
| <i>SPHK2</i>  | FDG-PET (ROI-based)                 | rs281380    | chr19: 49,214,470 | C | + | 4.15E-05 | 8.58E-05 | 7.35E-05 | eQTL                    | - | GTEEx v8 |
| <i>SMPD2</i>  | clinico-pathologic AD dementia*     | rs3799845   | chr6: 110,027,717 | A | + | 3.53E-05 | -        | 3.78E-05 | eQTL                    | + | GTEEx v8 |
| <i>SGMS1</i>  | FDG-PET (ROI-based)**               | rs372273418 | chr10: 52,382,799 | A | + | 5.35E-05 | 0.000196 | 5.83E-06 | location (intron)       |   |          |
| <i>SPTLC3</i> | RAVLT total score**                 | rs2327754   | chr20: 13,103,159 | T | - | 1.00E-04 | 6.71E-05 | 9.77E-06 | location (intron)       |   |          |

\* External (Beecham et al.)

\*\* Significant only in permutation test

**Abbreviations:** AD: Alzheimer's Disease; ADAS-Cog.13: Alzheimer's Disease Assessment Scale - Cognitive Subscale; ADNI: Alzheimer's Disease Neuroimaging Initiative; A-T-N-C: Apparent Total N-nitroso Compounds; chr: Chromosome; CN: Cognitively Normal; CSF: Cerebrospinal Fluid; eQTL: expression Quantitative Trait Loci; FDG: Fluorodeoxyglucose; GTEEx: Genotype-Tissue Expression project; PET: Positron Emission Tomography; RAVLT: Rey Auditory Verbal Learning Test; SM: Sphingomyelin; SNP: Single nucleotide polymorphism.

**Supplementary Table 4. Genome-wide and gene-wide significant associations for 14 related SMs for six genes in the pathway.**

| Gene Symbol  | Metabolite                             | Lead SNP   | Position (Grch37) | Effect Allele | Effect Direction | Min. p-value | Source         | p-value Threshold | link to gene            | eQTL direction | eQTL source   |
|--------------|----------------------------------------|------------|-------------------|---------------|------------------|--------------|----------------|-------------------|-------------------------|----------------|---------------|
| <i>CERS2</i> | sphingomyelin (d18:1/15:0, d16:1/17:0) | rs7548516  | chr1: 150,980,281 | T             | -                | 4.60E-05     | Shin et al.    | 1.07E-04          | eQTL                    | -              | GTEEx v8      |
|              | SM C16:0                               | rs11204752 | chr1: 150,958,133 | T             | -                | 1.22E-05     | ADNI-1/GO/2    | 1.07E-04          | eQTL                    | -              | GTEEx v8      |
|              | SM C16:1                               | rs1673160  | chr1: 150,970,836 | T             | +                | 4.45E-05     | ADNI-1/GO/2    | 1.07E-04          | eQTL                    | +              | Westra et al. |
|              | SM C24:0                               | rs11204752 | chr1: 150,958,133 | T             | -                | 5.28E-05     | ADNI-1/GO/2    | 1.07E-04          | eQTL                    | -              | GTEEx v8      |
|              | SM C26:0                               | rs11204752 | chr1: 150,958,133 | T             | -                | 2.01E-06     | ADNI-1/GO/2    | 1.07E-04          | eQTL                    | -              | GTEEx v8      |
|              | SM (OH) C22:1                          | rs771201   | chr1: 150,968,942 | C             | +                | 8.95E-06     | ADNI-1/GO/2    | 1.07E-04          | eQTL                    | +              | GTEEx v6      |
|              | SM (OH) C24:1                          | rs11204752 | chr1: 150,958,133 | T             | -                | 7.48E-06     | ADNI-1/GO/2    | 1.07E-04          | eQTL                    | -              | GTEEx v8      |
| <i>CERS4</i> | SM C18:0                               | rs12610250 | chr19: 8,277,713  | A             | -                | 9.87E-26     | Draisma et al. | 2.33E-05          | eQTL; location (intron) | -              | GTEEx v8      |
|              | SM C18:1                               | rs12610250 | chr19: 8,277,713  | A             | -                | 1.28E-21     | Draisma et al. | 2.33E-05          | eQTL; location (intron) | -              | GTEEx v8      |
|              | SM C20:2                               | rs10418768 | chr19: 8,280,621  | C             | -                | 6.94E-09     | Draisma et al. | 2.33E-05          | eQTL; location (intron) | -              | GTEEx v8      |
| <i>SGPL1</i> | SM C16:1                               | rs11594636 | chr10: 72,610,767 | A             | +                | 1.16E-05     | Draisma et al. | 1.94E-05          | eQTL; location (intron) | -              | GTEEx v8      |
|              | SM C18:1                               | rs2630339  | chr10: 72,574,353 | C             | +                | 3.41E-06     | Draisma et al. | 1.94E-05          | eQTL                    | -              | GTEEx v8      |
| <i>SGPP1</i> | sphingomyelin (d18:1/14:0, d16:1/16:0) | rs12891564 | chr14: 64,435,939 | A             | +                | 5.60E-31     | Shin et al.    | 3.55E-05          | eQTL                    | +              | GTEEx v8      |
|              | sphingomyelin (d18:1/15:0, d16:1/17:0) | rs12891564 | chr14: 64,435,939 | A             | +                | 7.93E-17     | Shin et al.    | 3.55E-05          | eQTL                    | +              | GTEEx v8      |
|              | SM (OH) C14:1                          | rs12589453 | chr14: 64,376,864 | A             | +                | 3.55E-23     | Draisma et al. | 3.55E-05          | eQTL                    | +              | GTEEx v8      |
| <i>SPHK2</i> | sphingomyelin (d18:1/14:0, d16:1/16:0) | rs601338   | chr19: 49,206,674 | A             | +                | 2.01E-05     | Shin et al.    | 7.35E-05          | eQTL                    | -              | GTEEx v8      |

|         |                                        |           |                   |   |   |          |                |          |      |   |          |
|---------|----------------------------------------|-----------|-------------------|---|---|----------|----------------|----------|------|---|----------|
| SPTLC3  | sphingomyelin (d18:1/14:0, d16:1/16:0) | rs4814176 | chr20: 12,959,398 | T | + | 2.97E-17 | Shin et al.    | 9.77E-06 | eQTL | + | GTEEx v8 |
|         | sphingomyelin (d18:1/15:0, d16:1/17:0) | rs4814176 | chr20: 12,959,398 | T | + | 1.04E-09 | Shin et al.    | 9.77E-06 | eQTL | + | GTEEx v8 |
|         | SM C26:0                               | rs680379  | chr20: 12,969,400 | A | + | 8.49E-15 | Draisma et al. | 9.77E-06 | eQTL | + | GTEEx v8 |
|         | SM C26:1                               | rs4814176 | chr20: 12,959,398 | T | + | 3.34E-13 | Draisma et al. | 9.77E-06 | eQTL | + | GTEEx v8 |
|         | SM (OH) C14:1                          | rs4814176 | chr20: 12,959,398 | T | + | 2.28E-11 | Draisma et al. | 9.77E-06 | eQTL | + | GTEEx v8 |
|         | SM (OH) C16:1                          | rs4814176 | chr20: 12,959,398 | T | + | 3.95E-13 | Draisma et al. | 9.77E-06 | eQTL | + | GTEEx v8 |
|         | SM (OH) C24:1                          | rs4814176 | chr20: 12,959,398 | T | + | 2.01E-32 | Draisma et al. | 9.77E-06 | eQTL | + | GTEEx v8 |
| SPTLC3* | SM (OH) C24:1/SM C16:0                 | rs680379  | chr20: 12,969,400 | A | + | 1.01E-09 | ADNI-1         | 9.77E-06 | eQTL | + | GTEEx v8 |
|         |                                        | rs168622  | chr20: 12,966,089 | T | + | 5.20E-25 | Illig et al.   | 9.77E-06 | eQTL | + | GTEEx v8 |

\* Ratio analysis

*Abbreviations:* ADNI: Alzheimer's Disease Neuroimaging; chr: Chromosome; eQTL: expression Quantitative Trait Loci; GTEEx: Genotype-Tissue Expression project; SM: Sphingomyelin species; SNP: Single Nucleotide Polymorphism.

**Supplementary Table 5. Statistical analysis of Figure 5 and Supplementary Figure 2.**

| Phenotype    | n   | Selected Covariates                  | Metabolite*   | Estimate       | Std. Error    | Statistic      | p-value         | p-gain         |
|--------------|-----|--------------------------------------|---------------|----------------|---------------|----------------|-----------------|----------------|
| Clinical AD  | 373 | Age, sex, education, copies of APOE4 | SM C16:0      | 1.0075         | 0.0034        | -2.1654        | 3.04E-02        |                |
|              |     |                                      | SM (OH) C24:1 | 0.8494         | 0.2235        | 0.7304         | 4.65E-01        |                |
|              |     |                                      | <b>ratio</b>  | <b>1.9453</b>  | <b>0.5174</b> | <b>3.7596</b>  | <b>1.70E-04</b> | <b>178.37</b>  |
| ADAS-Cog. 13 | 725 | Age, sex, education                  | SM C16:0      | 0.0243         | 0.0095        | 2.5460         | 1.11E-02        |                |
|              |     |                                      | SM (OH) C24:1 | -0.4983        | 0.6301        | -0.7908        | 4.29E-01        |                |
|              |     |                                      | <b>ratio</b>  | <b>-6.4817</b> | <b>1.4003</b> | <b>-4.6288</b> | <b>4.36E-06</b> | <b>2544.51</b> |
| SPARE-AD     | 731 | Age, sex                             | SM C16:0      | 0.0037         | 0.0013        | 2.7996         | 5.25E-03        |                |
|              |     |                                      | SM (OH) C24:1 | -0.0649        | 0.0876        | -0.7407        | 4.59E-01        |                |
|              |     |                                      | <b>ratio</b>  | <b>-0.8879</b> | <b>0.1970</b> | <b>-4.5077</b> | <b>7.64E-06</b> | <b>687.57</b>  |

\* Results for single metabolites are from Toledo et al.<sup>1</sup>

*Abbreviations:* AD: Alzheimer's Disease; ADAS-Cog.13: Alzheimer's Disease Assessment Scale - Cognitive Subscale; SM: Sphingomyelin species; SPARE-AD: Spatial Pattern of Abnormality for Recognition of Early Alzheimer's Disease.

**Supplementary Table 6. GWAS analyses for A-T-N-C measures, clinical diagnosis and metabolites levels in 1,576 individuals.**

| Experiment                                                                       | Comparison                                                                                          | Statistical Test                                        | Adjusted p-value  |
|----------------------------------------------------------------------------------|-----------------------------------------------------------------------------------------------------|---------------------------------------------------------|-------------------|
|                                                                                  | <u>Novel Object Recognition</u> :<br>Discrimination index.<br><b>Figure 5A.</b>                     | One-way ANOVA<br>$F_{(3,51)} = 5.715$                   | <b>0.002</b>      |
| <b>FTY720 ameliorates memory impairment in APP/PS1 mice.</b>                     | WT Vehicle vs. APP/PS1 Vehicle                                                                      | Tukey's post hoc.<br>$q_{(51)} = 4.528$                 | <b>0.0122</b>     |
| <b>Figure 5.</b>                                                                 | WT Vehicle vs. WT + FTY720                                                                          | Tukey's post hoc.<br>$q_{(51)} = 0.1099$                | 0.9998            |
|                                                                                  | WT Vehicle vs. APP/PS1 + FTY720                                                                     | Tukey's post hoc.<br>$q_{(51)} = 0.3512$                | 0.9946            |
|                                                                                  | APP/PS1 Vehicle vs. WT + FTY720                                                                     | Tukey's post hoc.<br>$q_{(51)} = 4.751$                 | <b>0.0078</b>     |
|                                                                                  | APP/PS1 Vehicle vs. APP/PS1 + FTY720                                                                | Tukey's post hoc.<br>$q_{(51)} = 3.993$                 | <b>0.0332</b>     |
|                                                                                  | WT + FTY720 vs. APP/PS1 + FTY720                                                                    | Tukey's post hoc.<br>$q_{(51)} = 0.2637$                | 0.9977            |
|                                                                                  | <u>Novel Object Recognition</u><br>Discrimination index against chance (Zero).<br><b>Figure 5A.</b> | One sample t-test                                       |                   |
| <b>FTY720 ameliorates memory impairment in APP/PS1 mice.</b><br><b>Figure 5.</b> | WT Vehicle vs. Zero                                                                                 | $t_{(10)} = 4.802$                                      | <b>0.0007</b>     |
|                                                                                  | WT + FTY720 vs. Zero                                                                                | $t_{(13)} = 3.546$                                      | <b>0.0036</b>     |
|                                                                                  | APP/PS1 Vehicle vs. Zero                                                                            | $t_{(19)} = 0.2171$                                     | 0.8304            |
|                                                                                  | APP/PS1 + FTY720 vs. Zero                                                                           | $t_{(9)} = 11.54$                                       | <b>&lt;0.0001</b> |
|                                                                                  | <u>Barnes Maze</u><br>Latency to find Escape hole.<br><b>Figure 5B.</b>                             | Two-way Repeated Measure ANOVA<br>$F_{(9,201)} = 1.223$ | 0.2827            |
|                                                                                  | <b>Day 1</b>                                                                                        |                                                         |                   |
|                                                                                  | WT Vehicle vs. WT+FTY720                                                                            | Tukey's post hoc.<br>$q_{(201)} = 1.807$                | 0.5846            |
|                                                                                  | WT Vehicle vs. APP/PS1 Vehicle                                                                      | Tukey's post hoc.<br>$q_{(201)} = 2.507$                | 0.3177            |
|                                                                                  | WT Vehicle vs. APP/PS1 + FTY720                                                                     | Tukey's post hoc.<br>$q_{(201)} = 0.4919$               | 0.9851            |



|                                                              |                                      |                                           |               |
|--------------------------------------------------------------|--------------------------------------|-------------------------------------------|---------------|
|                                                              | WT+FTY720 vs. APP/PS1 Vehicle        | Tukey's post hoc.<br>$q_{(201)} = 0.3258$ | 0.9956        |
|                                                              | WT+FTY720 vs. APP/PS1 + FTY720       | Tukey's post hoc.<br>$q_{(201)} = 1.794$  | 0.5904        |
|                                                              | APP/PS1 Vehicle vs. APP/PS1 + FTY720 | Tukey's post hoc.<br>$q_{(201)} = 3.110$  | 0.1415        |
| <b>Day 2</b>                                                 |                                      |                                           |               |
|                                                              | WT Vehicle vs. WT+FTY720             | Tukey's post hoc.<br>$q_{(201)} = 0.8049$ | 0.9404        |
| <b>FTY720 ameliorates memory impairment in APP/PS1 mice.</b> | WT Vehicle vs. APP/PS1 Vehicle       | Tukey's post hoc.<br>$q_{(201)} = 2.780$  | 0.2319        |
| <b>Figure 5.</b>                                             | WT Vehicle vs. APP/PS1 + FTY720      | Tukey's post hoc.<br>$q_{(201)} = 1.724$  | 0.6196        |
|                                                              | WT+FTY720 vs. APP/PS1 Vehicle        | Tukey's post hoc.<br>$q_{(201)} = 1.696$  | 0.6326        |
|                                                              | WT+FTY720 vs. APP/PS1 + FTY720       | Tukey's post hoc.<br>$q_{(201)} = 0.9309$ | 0.9119        |
|                                                              | APP/PS1 Vehicle vs. APP/PS1 + FTY720 | Tukey's post hoc.<br>$q_{(201)} = 0.4718$ | 0.9869        |
| <b>Day 3</b>                                                 |                                      |                                           |               |
|                                                              | WT Vehicle vs. WT+FTY720             | Tukey's post hoc.<br>$q_{(201)} = 1.998$  | 0.5045        |
|                                                              | WT Vehicle vs. APP/PS1 Vehicle       | Tukey's post hoc.<br>$q_{(201)} = 6.667$  | <b>0.0003</b> |
|                                                              | WT Vehicle vs. APP/PS1 + FTY720      | Tukey's post hoc.<br>$q_{(201)} = 3.988$  | <b>0.0394</b> |
|                                                              | WT+FTY720 vs. APP/PS1 Vehicle        | Tukey's post hoc.<br>$q_{(201)} = 5.741$  | <b>0.0019</b> |
|                                                              | WT+FTY720 vs. APP/PS1 + FTY720       | Tukey's post hoc.<br>$q_{(201)} = 2.757$  | 0.2305        |
|                                                              | APP/PS1 Vehicle vs. APP/PS1 + FTY720 | Tukey's post hoc.<br>$q_{(201)} = 2.688$  | 0.2447        |
| <b>Day 4</b>                                                 |                                      |                                           |               |
|                                                              | WT Vehicle vs. WT+FTY720             | Tukey's post hoc.<br>$q_{(201)} = 1.243$  | 0.8157        |
|                                                              | WT Vehicle vs. APP/PS1 Vehicle       | Tukey's post hoc.<br>$q_{(201)} = 5.114$  | 0.0056        |
|                                                              | WT Vehicle vs. APP/PS1 + FTY720      | Tukey's post hoc.<br>$q_{(201)} = 1.945$  | 0.5242        |

|                                                                                  |                                                                                                          |                                           |                   |
|----------------------------------------------------------------------------------|----------------------------------------------------------------------------------------------------------|-------------------------------------------|-------------------|
|                                                                                  | WT+FTY720 vs. APP/PS1 Vehicle                                                                            | Tukey's post hoc.<br>$q_{(201)} = 3.702$  | 0.0598            |
|                                                                                  | WT+FTY720 vs. APP/PS1 + FTY720                                                                           | Tukey's post hoc.<br>$q_{(201)} = 1.002$  | 0.8931            |
|                                                                                  | APP/PS1 Vehicle vs. APP/PS1 + FTY720                                                                     | Tukey's post hoc.<br>$q_{(201)} = 1.754$  | 0.6066            |
|                                                                                  | <u>Barnes Maze</u><br>Time spent in Escape hole.<br><b>Figure 5C.</b>                                    | Kruskal-Wallis test<br>Chi square = 19.93 | <b>0.0002</b>     |
| <b>FTY720 ameliorates memory impairment in APP/PS1 mice.</b>                     | WT Vehicle vs. APP/PS1 Vehicle                                                                           | Dunn's post hoc<br>$Z = 3.698$            | <b>0.0013</b>     |
| <b>Figure 5.</b>                                                                 | WT Vehicle vs. WT + FTY720                                                                               | Dunn's post hoc<br>$Z = 0.5109$           | >0.9999           |
|                                                                                  | WT Vehicle vs. APP/PS1 + FTY720                                                                          | Dunn's post hoc<br>$Z = 0.6318$           | >0.9999           |
|                                                                                  | APP/PS1 Vehicle vs. WT + FTY720                                                                          | Dunn's post hoc<br>$Z = 3.424$            | <b>0.0037</b>     |
|                                                                                  | APP/PS1 Vehicle vs. APP/PS1 + FTY720                                                                     | Dunn's post hoc<br>$Z = 3.404$            | <b>0.004</b>      |
|                                                                                  | WT + FTY720 vs. APP/PS1 + FTY720                                                                         | Dunn's post hoc<br>$Z = 0.1174$           | >0.9999           |
|                                                                                  | <u>Barnes Maze</u><br>Time spent in Escape hole against chance (0.05).<br><b>Figure 5C.</b>              | One sample t-test                         |                   |
| <b>FTY720 ameliorates memory impairment in APP/PS1 mice.</b><br><b>Figure 5.</b> | WT Vehicle vs. 0.05                                                                                      | $t_{(12)} = 8.396$                        | <b>&lt;0.0001</b> |
|                                                                                  | WT + FTY720 vs. 0.05                                                                                     | $t_{(16)} = 5.587$                        | <b>&lt;0.0001</b> |
|                                                                                  | APP/PS1 Vehicle vs. 0.05                                                                                 | $t_{(20)} = 6.559$                        | <b>&lt;0.0001</b> |
|                                                                                  | APP/PS1 + FTY720 vs. 0.05                                                                                | $t_{(18)} = 7.461$                        | <b>&lt;0.0001</b> |
|                                                                                  | <u>CA3-CA1 synapse LTP</u><br>Magnitude of LTP between 60 and 75 min after the HFS.<br><b>Figure 5E.</b> | Two-way ANOVA<br>$F_{(1,36)} = 8.975$     | <b>0.0049</b>     |
|                                                                                  | Vehicle:WT vs. Vehicle:APP/PS1                                                                           | Tukey's post hoc.<br>$q_{(36)} = 4.575$   | <b>0.0133</b>     |
| <b>FTY720 ameliorates synaptic impairment in APP/PS1 mice.</b>                   | Vehicle:WT vs. FTY720:WT                                                                                 | Tukey's post hoc.<br>$q_{(36)} = 0.2969$  | 0.9967            |

|                                                                                      |                                                                                                                      |                                          |        |
|--------------------------------------------------------------------------------------|----------------------------------------------------------------------------------------------------------------------|------------------------------------------|--------|
| <b>Figure 5.</b>                                                                     |                                                                                                                      |                                          |        |
|                                                                                      | Vehicle:WT vs. FYT720:APP/PS1                                                                                        | Tukey's post hoc.<br>$q_{(36)} = 1.285$  | 0.8005 |
|                                                                                      | Vehicle:APP/PS1 vs. FYT720:WT                                                                                        | Tukey's post hoc.<br>$q_{(36)} = 4.001$  | 0.0364 |
|                                                                                      | Vehicle:APP/PS1 vs.<br>FYT720:APP/PS1                                                                                | Tukey's post hoc.<br>$q_{(36)} = 5.587$  | 0.0019 |
|                                                                                      | FYT720:WT vs. FYT720:APP/PS1                                                                                         | Tukey's post hoc.<br>$q_{(36)} = 1.482$  | 0.7227 |
|                                                                                      | <u>LECII-LECII synapse LTP</u><br>Magnitude of LTP between 60<br>and 75 min after the HFS.<br><b>Figure 5G.</b>      | Two-way ANOVA<br>$F_{(1,24)} = 12.34$    | 0.0018 |
|                                                                                      | Vehicle:WT vs. Vehicle:APP/PS1                                                                                       | Tukey's post hoc.<br>$q_{(24)} = 7.440$  | 0.0001 |
| <b>FTY720 ameliorates synaptic impairment in APP/PS1 mice. Figure 5.</b>             | Vehicle:WT vs. FYT720:WT                                                                                             | Tukey's post hoc.<br>$q_{(24)} = 2.208$  | 0.4187 |
|                                                                                      | Vehicle:WT vs. FYT720:APP/PS1                                                                                        | Tukey's post hoc.<br>$q_{(24)} = 2.623$  | 0.2735 |
|                                                                                      | Vehicle:APP/PS1 vs. FYT720:WT                                                                                        | Tukey's post hoc.<br>$q_{(24)} = 5.232$  | 0.0058 |
|                                                                                      | Vehicle:APP/PS1 vs.<br>FYT720:APP/PS1                                                                                | Tukey's post hoc.<br>$q_{(24)} = 4.816$  | 0.0116 |
|                                                                                      | FYT720:WT vs. FYT720:APP/PS1                                                                                         | Tukey's post hoc.<br>$q_{(24)} = 0.4155$ | 0.9909 |
| <b>FTY720 ameliorates memory impairment in APP/PS1 mice. Supplementary Figure 2.</b> | <u>Novel Object Recognition</u><br>Discrimination index.<br><b>Supplementary Figure 2A.</b>                          | Unpaired two-sided<br>Student's t-test   |        |
|                                                                                      | APP/PS1 7mo vs. WT 7mo                                                                                               | $t_{(14)} = 2.230$                       | 0.0426 |
| <b>FTY720 ameliorates memory impairment in APP/PS1 mice. Supplementary Figure 2.</b> | <u>Novel Object Recognition</u><br>Discrimination index against<br>chance (Zero).<br><b>Supplementary Figure 2A.</b> | One sample t-test                        |        |
|                                                                                      | WT 7mo vs. Zero                                                                                                      | $t_{(4)} = 4.407$                        | 0.0116 |
|                                                                                      | APP/PS1 7mo vs. Zero                                                                                                 | $t_{(10)} = 0.3131$                      | 0.7606 |

|                                                                                                    |                                                                                                                                                     |                                                              |               |
|----------------------------------------------------------------------------------------------------|-----------------------------------------------------------------------------------------------------------------------------------------------------|--------------------------------------------------------------|---------------|
|                                                                                                    | <u>Barnes Maze</u><br>Latency to find Escape hole.<br><b>Supplementary Figure 2B.</b>                                                               | Two-way Repeated<br>Measure ANOVA<br>$F_{(3,36)} = 0.7277$   | 0.5422        |
| <b>FTY720 ameliorates<br/>memory impairment in<br/>APP/PS1 mice.</b>                               | <b>Day 1</b>                                                                                                                                        |                                                              |               |
| <b>Supplementary Figure 2.</b>                                                                     | WT 7mo - APP/PS1 7mo                                                                                                                                | Šídák's post hoc<br>$t_{(36)} = 3.098$                       | <b>0.015</b>  |
|                                                                                                    | <b>Day 2</b>                                                                                                                                        |                                                              |               |
|                                                                                                    | WT 7mo - APP/PS1 7mo                                                                                                                                | Šídák's post hoc<br>$t_{(36)} = 3.156$                       | <b>0.0128</b> |
|                                                                                                    | <b>Day 3</b>                                                                                                                                        |                                                              |               |
|                                                                                                    | WT 7mo - APP/PS1 7mo                                                                                                                                | Šídák's post hoc<br>$t_{(36)} = 1.999$                       | 0.1964        |
|                                                                                                    | <b>Day 4</b>                                                                                                                                        |                                                              |               |
|                                                                                                    | WT 7mo - APP/PS1 7mo                                                                                                                                | Šídák's post hoc<br>$t_{(36)} = 1.418$                       | 0.5137        |
| <b>FTY720 ameliorates<br/>memory impairment<br/>Supplementary Figure 2.</b>                        | <u>Barnes Maze</u><br>Time spent in Escape hole.<br><b>Supplementary Figure 2C.</b>                                                                 | Unpaired two-sided<br>Student's t-test                       |               |
|                                                                                                    | APP/PS1 7mo Vs. WT 7mo                                                                                                                              | $t_{(7)} = 3.131$                                            | <b>0.0166</b> |
| <b>FTY720 ameliorates<br/>memory impairment in<br/>APP/PS1 mice.<br/>Supplementary Figure 2.</b>   | <u>Barnes Maze</u><br>Time spent in Escape hole against<br>chance (0.05).<br><b>Supplementary Figure 2C.</b>                                        | One sample t-test                                            |               |
|                                                                                                    | WT 7mo vs. Zero                                                                                                                                     | $t_{(3)} = 5.695$                                            | <b>0.0107</b> |
|                                                                                                    | APP/PS1 7mo vs. Zero                                                                                                                                | $t_{(4)} = 4.264$                                            | <b>0.013</b>  |
| <b>FTY720 ameliorates<br/>synaptic impairment in<br/>APP/PS1 mice.<br/>Supplementary Figure 2.</b> | <u>CA3-CA1 synapse LTP</u><br>Magnitude of LTP between 60<br>and 75 min after the HFS.<br><b>Supplementary Figure 2E.</b><br>APP/PS1 7mo vs. WT 7mo | Unpaired two-sided<br>Student's t-test<br>$t_{(13)} = 5.197$ | <b>0.0002</b> |
| <b>FTY720 ameliorates<br/>synaptic impairment in<br/>APP/PS1 mice.<br/>Supplementary Figure 2.</b> | <u>LECII-LECII synapse LTP</u><br>Magnitude of LTP between 60<br>and 75 min after the HFS<br><b>Supplementary Figure 2G.</b>                        | Unpaired two-sided<br>Student's t-test                       |               |
|                                                                                                    | APP/PS1 7mo Vs. WT 7mo                                                                                                                              | $t_{(6)} = 4.918$                                            | <b>0.0027</b> |

*Abbreviations:* ANOVA: Analysis of Variance; A-T-N-C: Apparent Total N-nitroso Compounds; GWAS: Genome-Wide Association Study; LTP: Long-Term Potentiation; WT: Wild Type.

**Supplementary Figure 1. Association of genetic variants in *CERS3* with CSF t-tau biomarker.**

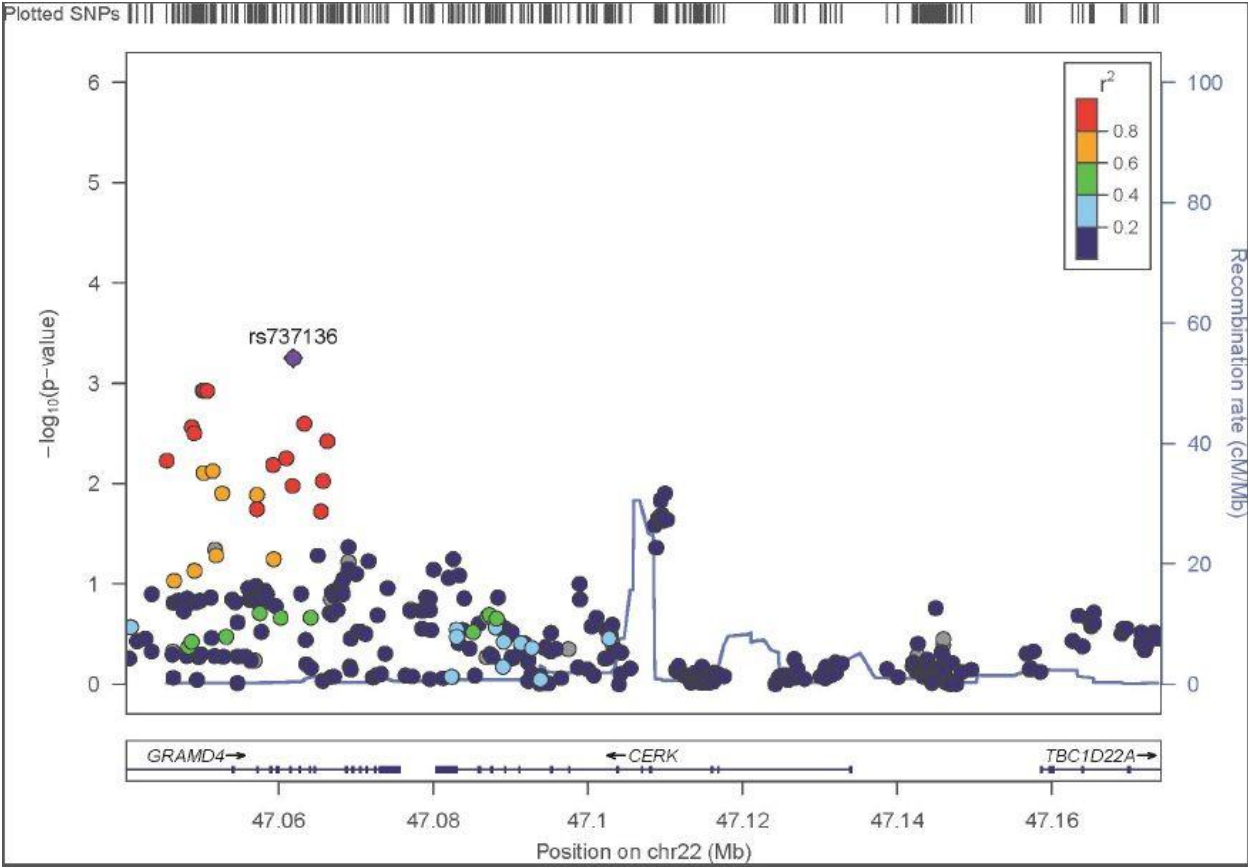

Abbreviation: chr: Chromosome.

**Supplementary Figure 2. Comparative analysis of memory and synaptic plasticity in APP/PS1 and wildtype 7 months old mice.**

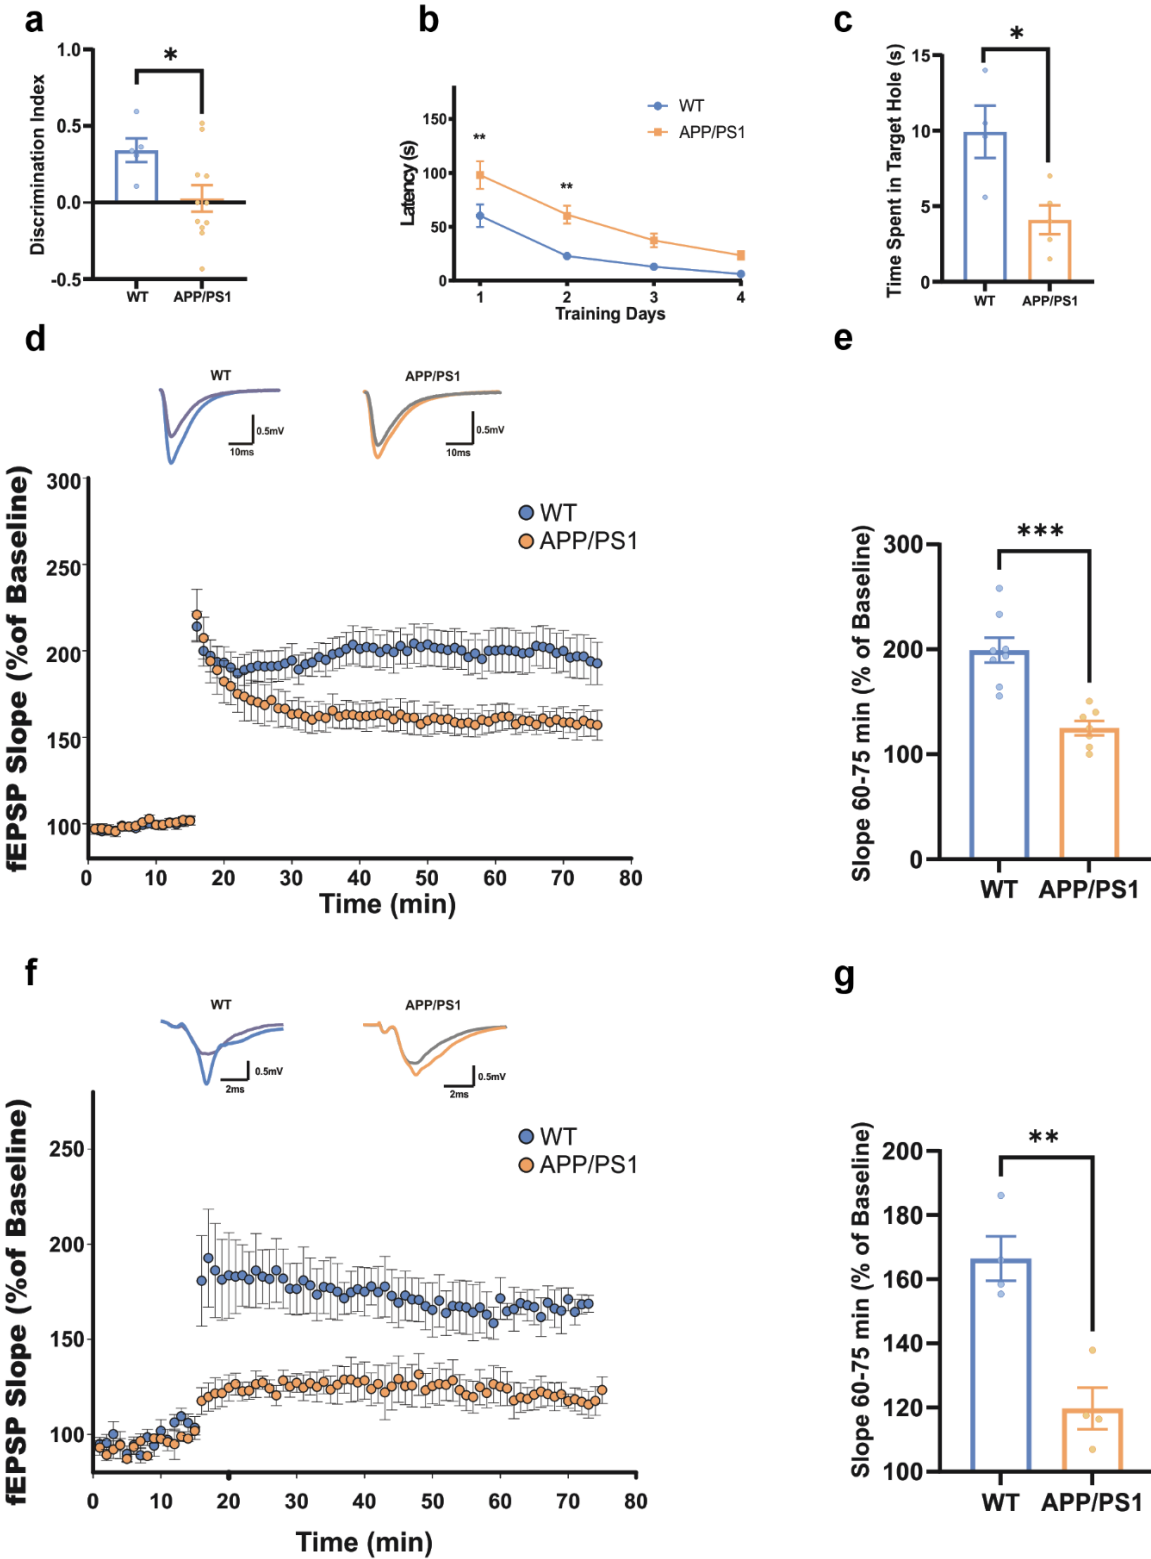

**a.** Exploration time spent on the novel object in the NOR test session. Data are expressed as a discrimination index  $\pm$  SEM. **b.** Barnes maze performance during training days. The average time (in seconds) to locate the escape hole during the four trials per day was expressed in mean  $\pm$  SEM. **c.** The time spent in the target hole is plotted  $\pm$  SEM. **d.** LTP assessment at the CA3-CA1 synapse. The two small line graphs are representative analog traces of evoked EPSPs before (light purple and grey) and 1 hr. after high-frequency stimulation (HFS) (blue and orange). The large plot graph shows normalized evoked excitatory postsynaptic potentials (EPSPs) slopes in APP/PS1 and WT mice before (first 15 min. of baseline) and after HFS (HFS, delivered at 16-min). **e.** Magnitude of LTP between 60 and 75 min after HFS. Data represent mean fEPSP Slope  $\pm$  SEM. APP/PS1 mice showed reduced LTP in the CA3-CA1 synapse. **f.** LTP assessment at the LECII-LECII synapse. The two small line graphs are representative analog traces of evoked EPSPs before (light purple and grey) and 1 hr. after HFS (blue and orange). The large plot graph is an LTP timeline. **g.** Magnitude of LTP between 60 and 75 min after HFS. Data represent mean fEPSP Slope  $\pm$  SEM. APP/PS1 mice showed reduced LTP in the LECII-LECII synapse. \* $p < 0.05$ , \*\* $p < 0.01$ , and \*\*\* $p < 0.001$ . *Abbreviations:* fEPSP: Field excitatory post-synaptic potentials; WT: Wild type.

## Supplementary References

1. Toledo, J. B. *et al.* Metabolic network failures in Alzheimer's disease: A biochemical road map. *Alzheimers. Dement.* **13**, 965–984 (2017).
