# Supplementary material for: Multi-Omic analyses characterize the ceramide/sphingomyelin pathway as a therapeutic target in Alzheimer’s disease
Source: PubMed Central journal article supplement (PMC9547905; doi:10.1038/s42003-022-04011-6), 2022-10-08
Supplement: 42003_2022_4011_MOESM2_ESM.pdf [file 42003_2022_4011_MOESM2_ESM.pdf]

## Description of Additional Supplementary Files

**File name:** Supplementary Data 1

**Description:** A listing of the sphingolipids profiled in ADNI1 individuals.
